# Supplementary material for: A genome wide study in fission yeast reveals nine PPR proteins that regulate mitochondrial gene expression
Source: PubMed Central journal article supplement — Nucleic Acids Res. 2011 Jun 28;39(18):8029–41. doi: 10.1093/nar/gkr511 (PMC3185421; doi:10.1093/nar/gkr511), 2011-06-28
Supplement: supp_gkr511_Table_S1.pdf [file supp_gkr511_Table_S1.pdf]

## Supplementary material Kühl et al. Ms # NAR-00951-V-2011

Table S1: *S. pombe* strains used and constructed in this study

| Name     | Nuclear genotype                                                                                              | Reference          |
|----------|---------------------------------------------------------------------------------------------------------------|--------------------|
| NB205-1A | <i>h+ ade6-M216 ura4-D1.8 his3Δ leu1-32 rho+</i>                                                              | (34)               |
| NB205-6A | <i>h- ade6-M216 ura4-D1.8 his3Δ leu1-32 rho+</i>                                                              | (34)               |
| FY14145  | <i>h+ ade6 leu1-32 ura4-D18 tel1::ura4 pku70::ade6 rho+</i>                                                   | F. Ishikawa (NBRP) |
| FY14191  | <i>h- leu1-32 ura4-D18 pKu80::ura4 rho+</i>                                                                   | F. Ishikawa (NBRP) |
| P3       | <i>h+ ade7-50 rho+ Δi</i>                                                                                     | (30)               |
| LD11     | <i>h- leu1-32 ura4-D1.8 pKu80::ura4 Δppr1::kan<sup>R</sup> rho+</i>                                           | This work          |
| LD13-1   | <i>h+ ade6-M216 ura4-D1.8 leu1-32 Δppr1::kan<sup>R</sup> rho+</i>                                             | This work          |
| LD3-2    | <i>h+ ade6 leu1-32 ura4-D1.8 tel1::ura4 pku70::ade6 Δppr2::kan<sup>R</sup> rho+</i>                           | This work          |
| LD10-20A | <i>h+ ade6-M216 leu1-32 ura4-D1.8 Δppr2::kan<sup>R</sup> rho+</i>                                             | This work          |
| LD14-2   | <i>h- ade6-M216 ura4-D1.8 his3Δ leu1-32 Δppr3::kan<sup>R</sup> rho+</i>                                       | This work          |
| IK39-3   | <i>h- ade6-M216 ura4-D1.8 his3Δ leu1-32 Δppr4::kan<sup>R</sup> rho+</i>                                       | This work          |
| IK5-1    | <i>h- ade6-M216 ura4-D1.8 his3Δ leu1-32 Δppr5::kan<sup>R</sup> rho+</i>                                       | This work          |
| IK91-4   | <i>h- ade6-M216 ura4-D1.8 his3Δ leu1-32 Δppr6::kan<sup>R</sup> rho+</i>                                       | This work          |
| IK93-1   | <i>h- ade6-M216 ura4-D1.8 his3Δ leu1-32 Δppr7::kan<sup>R</sup> rho+</i>                                       | This work          |
| IK95-6   | <i>h- ade6-M216 ura4-D1.8 his3Δ leu1-32 Δppr8::kan<sup>R</sup> rho+</i>                                       | This work          |
| IK81-17  | <i>h- ade6-M216 ura4-D1.8 his3Δ leu1-32 Δppr4::nat<sup>R</sup> Δppr5::kan<sup>R</sup> rho+</i>                | This work          |
| IK77-22  | <i>h+ ade7-50 Δppr1::kan<sup>R</sup> rho+ Δi</i>                                                              | This work          |
| IK78-1   | <i>h+ ade7-50 Δppr2::kan<sup>R</sup> rho+ Δi</i>                                                              | This work          |
| IK79-10  | <i>h+ ade7-50 Δppr3::kan<sup>R</sup> rho+ Δi</i>                                                              | This work          |
| IK69-2   | <i>h+ ade7-50 Δppr4::kan<sup>R</sup> rho+ Δi</i>                                                              | This work          |
| IK75-16  | <i>h+ ade7-50 Δppr5::kan<sup>R</sup> rho+ Δi</i>                                                              | This work          |
| IK90-1   | <i>h+ ade7-50 Δppr6::kan<sup>R</sup> rho+ Δi</i>                                                              | This work          |
| IK92-3   | <i>h+ ade7-50 Δppr7::kan<sup>R</sup> rho+ Δi</i>                                                              | This work          |
| IK94-1   | <i>h+ ade7-50 Δppr8::kan<sup>R</sup> rho+ Δi</i>                                                              | This work          |
| IK96-1   | <i>h+ ade7-50 Δppr4::nat<sup>R</sup> Δppr5::kan<sup>R</sup> rho+ Δi</i>                                       | This work          |
| CHP004   | <i>h- ade6-M216 ura4-D1.8 his3Δ leu1-32 ppr1-cMyc rho+</i>                                                    | This work          |
| LD16     | <i>h+ ade6-M216 leu1-32 ura4-D1.8 Δppr2::kan<sup>R</sup> leu1+::ppr2-FLAG<sub>2</sub>His<sub>6</sub> rho+</i> | This work          |
| LD17     | <i>h+ ade6-M216 leu1-32 ura4-D1.8 Δppr2::kan<sup>R</sup> leu1+::ppr2-YFP-FLAG-His<sub>6</sub> rho+</i>        | This work          |
| CHP020   | <i>h- ade6-M216 ura4-D1.8 his3Δ leu1-32 ppr2-cMyc rho+</i>                                                    | This work          |

|        |                                                                                                                     |           |
|--------|---------------------------------------------------------------------------------------------------------------------|-----------|
| LD20   | <i>h- ade6-M216 ura4-D1.8 his3Δ Δppr3::kan<sup>R</sup> leu1+::ppr3-FLAG<sub>2</sub>His<sub>6</sub> rho+</i>         | This work |
| IK73   | <i>h- ade6-M216 ura4-D1.8 his3Δ leu1+::ppr4-FLAG<sub>2</sub>His<sub>6</sub> rho+</i>                                | This work |
| IK66-1 | <i>h- ade6-M216 ura4-D1.8 his3Δ Δppr4::kan<sup>R</sup> leu1+::ppr4-FLAG<sub>2</sub>His<sub>6</sub> rho+</i>         | This work |
| CHP002 | <i>h- ade6-M216 ura4-D1.8 his3Δ leu1-32 ppr4-YFP rho+</i>                                                           | This work |
| IK72   | <i>h- ade6-M216 ura4-D1.8 his3Δ leu1+::ppr5-FLAG<sub>2</sub>His<sub>6</sub> rho+</i>                                | This work |
| IK80-N | <i>h- ade6-M216 ura4-D1.8 his3Δ leu1-32 Δppr5::kan<sup>R</sup> leu1+::ppr5-FLAG<sub>2</sub>His<sub>6</sub> rho+</i> | This work |
| CHP001 | <i>h- ade6-M216 ura4-D1.8 his3Δ leu1-32 ppr5-YFP rho+</i>                                                           | This work |
| CHP012 | <i>h- ade6-M216 ura4-D1.8 his3Δ leu1-32 ppr5-HA<sub>3</sub> rho+</i>                                                | This work |
| CHP015 | <i>h- ade6-M216 ura4-D1.8 his3Δ leu1-32 ppr6-HA<sub>3</sub> rho+</i>                                                | This work |
| CHP016 | <i>h- ade6-M216 ura4-D1.8 his3Δ leu1-32 ppr7-HA<sub>3</sub> rho+</i>                                                | This work |
| CHP017 | <i>h- ade6-M216 ura4-D1.8 his3Δ leu1-32 ppr8-HA<sub>3</sub> rho+</i>                                                | This work |

30. Schäfer, B., Merlos-Lange, A.M., Anderl, C., Welser, F., Zimmer, M. and Wolf, K. (1991) The mitochondrial genome of fission yeast: inability of all introns to splice autocatalytically, and construction and characterization of an intronless genome. *Mol. Gen. Genet.*, **225**, 158-167.
34. Chiron, S., Suleau, A. and Bonnefoy, N. (2005) Mitochondrial translation: elongation factor tu is essential in fission yeast and depends on an exchange factor conserved in humans but not in budding yeast. *Genetics*, **169**, 1891-1901.
